# Supplementary material for: miR-23b-3p rescues cognition in Alzheimer’s disease by reducing tau phosphorylation and apoptosis via GSK-3β signaling pathways
Source: PubMed Central journal article supplement — Mol Ther Nucleic Acids. 2022 Apr 18;28:539–57. doi: 10.1016/j.omtn.2022.04.008 (PMC9092887; doi:10.1016/j.omtn.2022.04.008), 2022-04-18
Supplement: mmc1.pdf [file mmc1.pdf]

OMTN, Volume 28

## Supplemental information

**miR-23b-3p rescues cognition in Alzheimer's  
disease by reducing tau phosphorylation and  
apoptosis via GSK-3 $\beta$  signaling pathways**

**Hailun Jiang, Jiangong Liu, Shuilong Guo, Li Zeng, Zhongdi Cai, Junxia Zhang, Linlin Wang, Zhuorong Li, and Rui Liu**

## Supplementary Tables and Figures

**Supplementary Table 1.** List of miRNAs with low expression and unchanged expression in APP/PS1 mice at different disease stages compared with age-matched WT controls using high-throughput sequencing analysis.

|                    | 1-month-old<br>APP/PS1 mice<br>versus WT control |      |      | 3-month-old<br>APP/PS1 mice<br>versus WT control |      |      | 6-month-old<br>APP/PS1 mice<br>versus WT control |      |      | 9-month-old<br>APP/PS1 mice<br>versus WT control |      |      |
|--------------------|--------------------------------------------------|------|------|--------------------------------------------------|------|------|--------------------------------------------------|------|------|--------------------------------------------------|------|------|
|                    | 1                                                | 2    | 3    | 1                                                | 2    | 3    | 1                                                | 2    | 3    | 1                                                | 2    | 3    |
|                    | <b>miR-23b-3p</b>                                | 1.00 | 0.58 | 0.68                                             | 0.95 | 1.06 | 0.88                                             | 0.88 | 0.47 | 0.62                                             | 0.61 | 0.76 |
| <b>miR-195a-5p</b> | 1.30                                             | 0.50 | 0.57 | 1.23                                             | 0.82 | 0.89 | 1.04                                             | 0.47 | 0.82 | 0.76                                             | 0.87 | 0.54 |
| <b>miR-486a-3p</b> | 1.61                                             | 0.92 | 1.96 | 0.35                                             | 0.46 | 0.58 | 1.15                                             | 0.58 | 0.58 | 0.46                                             | 1.15 | 0.58 |
| <b>miR-339-5p</b>  | 1.09                                             | 0.79 | 1.24 | 1.00                                             | 1.12 | 1.15 | 0.88                                             | 1.21 | 0.72 | 1.13                                             | 1.00 | 1.24 |
| <b>miR-19a-3p</b>  | 2.14                                             | 1.39 | 1.57 | 1.07                                             | 1.52 | 1.27 | 1.39                                             | 0.86 | 0.54 | 0.75                                             | 1.16 | 0.96 |
| <b>miR-29a-3p</b>  | 0.90                                             | 0.58 | 0.67 | 0.87                                             | 1.10 | 0.94 | 0.95                                             | 0.75 | 0.65 | 0.78                                             | 0.89 | 0.77 |
| <b>miR-130a-3p</b> | 1.50                                             | 1.00 | 1.50 | 2.00                                             | 1.00 | 2.00 | 2.00                                             | 1.50 | 1.00 | 1.00                                             | 1.00 | 1.00 |
| <b>miR-21a-5p</b>  | 1.15                                             | 0.23 | 0.23 | 0.23                                             | 1.15 | 0.92 | 1.38                                             | 0.23 | 0.92 | 1.15                                             | 0.92 | 1.15 |
| <b>miR-1298-5p</b> | 0.69                                             | 0.98 | 1.03 | 0.52                                             | 1.08 | 0.69 | 0.82                                             | 0.63 | 0.30 | 0.96                                             | 0.54 | 1.04 |
| <b>miR-26b-3p</b>  | 1.23                                             | 0.59 | 0.77 | 0.95                                             | 1.19 | 0.80 | 0.94                                             | 0.56 | 0.64 | 0.73                                             | 1.17 | 0.69 |
| <b>miR-192-5p</b>  | 1.33                                             | 0.70 | 0.90 | 0.94                                             | 1.16 | 0.97 | 1.04                                             | 0.77 | 0.54 | 1.46                                             | 0.76 | 0.67 |
| <b>miR-10b-5p</b>  | 2.14                                             | 1.00 | 0.88 | 1.17                                             | 0.70 | 0.65 | 1.06                                             | 0.70 | 0.40 | 1.20                                             | 0.88 | 0.63 |
| <b>miR-193a-5p</b> | 1.14                                             | 1.00 | 0.71 | 0.57                                             | 0.43 | 0.71 | 0.71                                             | 0.14 | 0.29 | 1.14                                             | 0.29 | 0.86 |
| <b>miR-1298-3p</b> | 0.91                                             | 1.02 | 2.12 | 0.61                                             | 1.90 | 1.00 | 1.37                                             | 1.17 | 0.29 | 0.87                                             | 0.59 | 1.36 |
| <b>miR-133a-3p</b> | 1.21                                             | 0.63 | 0.75 | 1.48                                             | 1.35 | 1.04 | 1.25                                             | 0.73 | 0.96 | 0.79                                             | 0.97 | 0.70 |
| <b>miR-138-5p</b>  | 1.24                                             | 0.94 | 1.40 | 1.01                                             | 1.70 | 1.20 | 1.22                                             | 0.60 | 0.57 | 0.78                                             | 0.71 | 0.99 |
| <b>miR-218-3p</b>  | 1.30                                             | 0.81 | 1.16 | 1.25                                             | 1.42 | 1.22 | 1.08                                             | 0.61 | 0.67 | 0.86                                             | 0.93 | 0.76 |
| <b>miR-28a-3p</b>  | 1.46                                             | 0.84 | 1.10 | 1.21                                             | 1.58 | 0.98 | 1.20                                             | 1.10 | 0.66 | 1.18                                             | 1.15 | 1.04 |
| <b>miR-3072-3p</b> | 1.89                                             | 1.25 | 1.39 | 1.54                                             | 1.67 | 1.09 | 1.15                                             | 0.44 | 0.38 | 0.93                                             | 1.19 | 1.11 |
| <b>miR-449a-5p</b> | 0.88                                             | 0.74 | 1.38 | 0.85                                             | 1.54 | 1.07 | 1.32                                             | 0.50 | 0.47 | 0.41                                             | 0.41 | 1.57 |

**Supplementary Table 2.** Predicted miR-23b-3p targets obtained from TargetScan, miRDB and Tarbase with SVR and PhastCons scores.

| Target gene | SVR score                 | PhastCons score        |
|-------------|---------------------------|------------------------|
| ASAP1       | -0.3285, -0.6249          | 0.5245, 0.7704         |
| CA2         | -1.2158                   | 0.5660                 |
| CEP350      | -0.1122, -1.1661          | 0.6767, 0.6834         |
| GSK3B       | -0.5377                   | 0.6265                 |
| HS6ST2      | -0.8510, -1.1982          | 0.6642, 0.6872         |
| KIAA1109    | -1.0751                   | 0.5632                 |
| MARCKSL1    | -1.1870                   | 0.7188                 |
| MCFD2       | -0.3414, -0.6952          | 0.7049, 0.7040         |
| NEK6        | -0.8075, -1.3071          | 0.6007, 0.7370         |
| NLGN4X      | -0.2045, -0.1165, -0.8240 | 0.5776, 0.5717, 0.6554 |
| PTEN        | -0.8937, -0.4545          | 0.6396, 0.7878         |
| TAB3        | -0.3918, -0.2632          | 0.5845, 0.6660         |
| TARDBP      | -0.2616, -0.3191          | 0.6722, 0.5824         |
| TMEM38B     | -0.2125                   | 0.6526                 |
| TTC33       | -0.1832                   | 0.5430                 |
| ZNF423      | -1.2174                   | 0.8157                 |
| CACUL1      | /                         | /                      |
| SIPA1L1     | /                         | /                      |

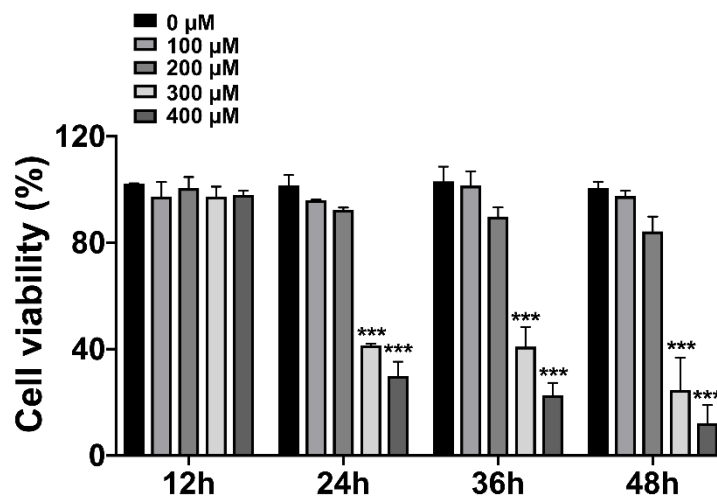

**Supplementary Figure 1. Cytotoxicity of copper in APPswe cells.** Results represent means  $\pm$  SEM.

$n = 3$ . \*\*\* $p < 0.001$  vs. control. Comparisons among multiple groups were analyzed by one-way ANOVA, followed by Turkey's *post-hoc* testing to analyze differences between groups.

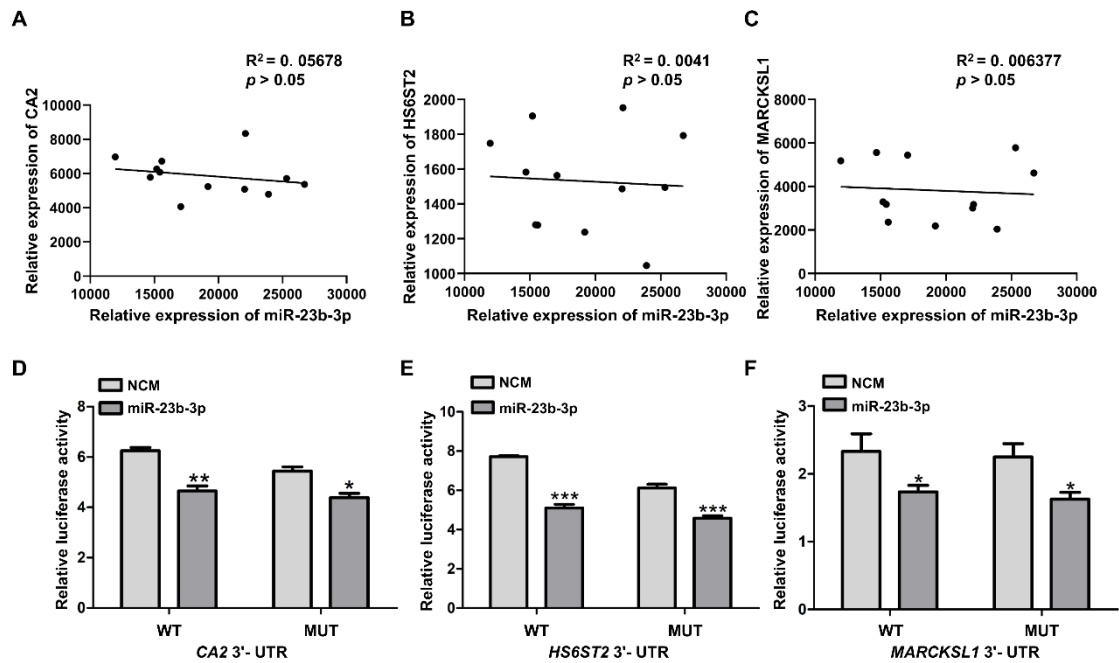

**Supplementary Figure 2. Validation of the relationship between miR-23b-3p and three additional predicted targets.** (A-C) The correlation analysis between miR-23b-3p and CA2 (A), HS6ST2 (B), and MARCKSL1 (C). (D-F) Dual-luciferase reporter assay of HEK293 cells transfected with WT 3'-UTR or MUT 3'-UTR reporter of CA2 (D), HS6ST2 (E), and MARCKSL1 (F) together with miR-23b-3p mimics or NCM. Comparisons between two groups were analyzed by unpaired *t*-test. Results represent means  $\pm$  SEM.  $n = 4$ . \* $p < 0.05$ , \*\* $p < 0.01$ , \*\*\* $p < 0.001$  vs. NCM.

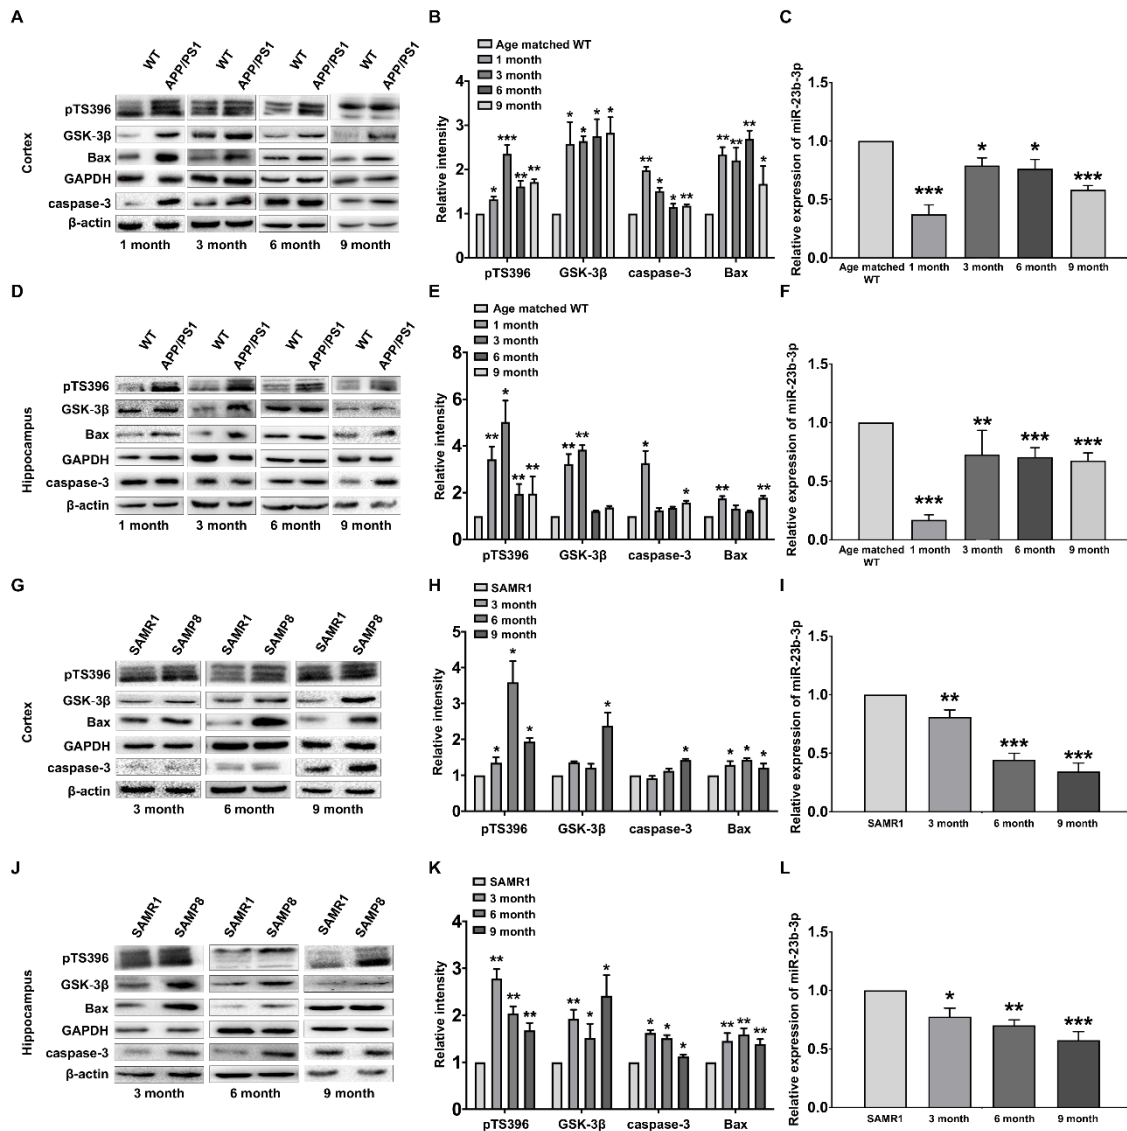

**Supplementary Figure 3. Expression of miR-23b-3p-related GSK-3β signaling pathways in the brain of APP/PS1 and SAMP8 mice.** (A-F) Expression of p-Tau-Ser396, GSK-3β, caspase-3, miR-23b-3p, and Bax protein in the cortex (A-C) and hippocampus (D-F) of APP/PS1 mice. (G-L) Expression of p-Tau-Ser396, GSK-3β, caspase-3, miR-23b-3p, and Bax protein in the cortex (G-I) and hippocampus (J-L) of SAMP8 mice. β-actin and GAPDH were used as loading controls. Comparisons among multiple groups were analyzed by one-way ANOVA, followed by Turkey's *post-hoc* testing to analyze differences between groups. Results represent means ± SEM.  $n = 4$ . \* $p < 0.05$ , \*\* $p < 0.01$ , \*\*\* $p < 0.001$  vs. WT or SAMR1.

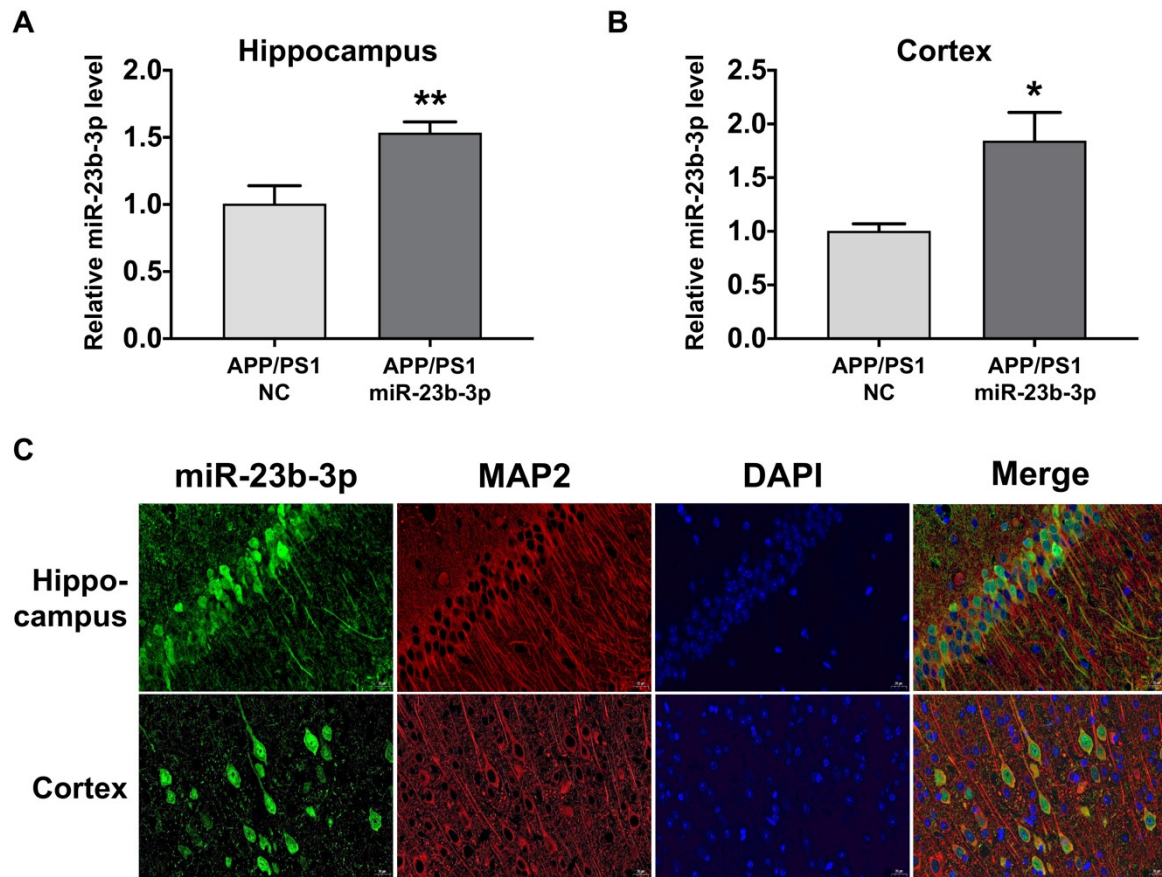

**Supplementary Figure 4. miR-23b-3p upregulation and distribution in the brain.** (A-B) miR-23b-3p upregulation in the hippocampus (A) and cortex (B) of AAV-miR-23b-3p-treated APP/PS1 mice. Comparisons between two groups were analyzed by unpaired *t*-test. (C) Double-labeling for AAV-CAG-EGFP-miR-23b-3p and microtubule associated protein 2 (MAP2, neuron-specific cytoskeletal protein; Proteintech Group, Inc., Rosemont, IL, USA) in the hippocampus and cortex of AAV-miR-23b-3p-treated APP/PS1 mice. Results represent means  $\pm$  SEM. *n* = 4. Bar, 20  $\mu$ m. \**p* < 0.05, \*\**p* < 0.01 vs. APP/PS1 mice treated with NC.

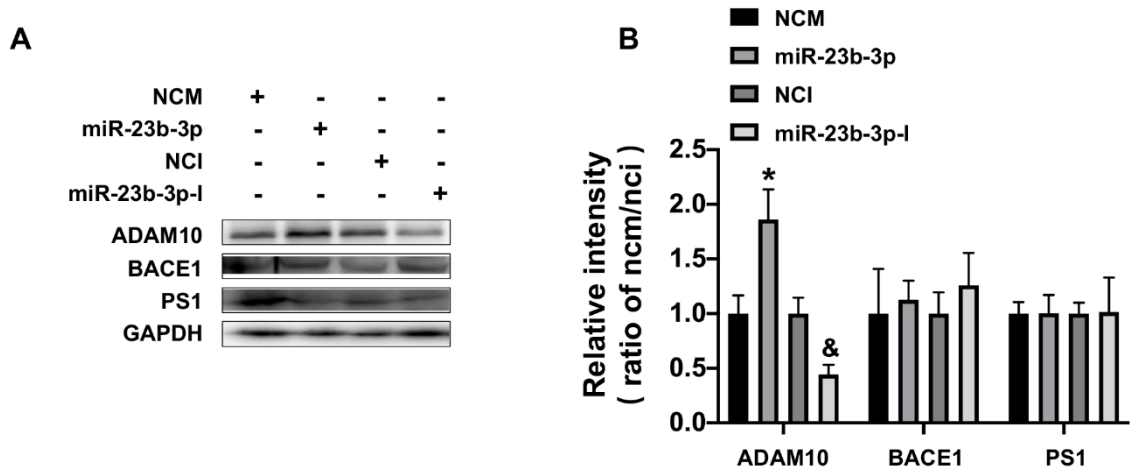

**Supplementary Figure 5. Effects of miR-23b-3p on the amyloidogenic and non-amyloidogenic pathways in APPswe cells.** (A) Western blot images of ADAM10, BACE1, and PS1 in copper-treated APPswe cells after transfection of negative control mimics (NCM), miR-23b-3p mimics (miR-23b-3p), and inhibitor (miR-23b-3p-I); (B) Quantitative analysis of these proteins measure in western blot. Comparisons between two groups were analyzed by unpaired *t*-test. Results represent means  $\pm$  SEM.  $n = 3$ . \* $p < 0.05$  vs. NCM, & $p < 0.05$  vs. NCI.

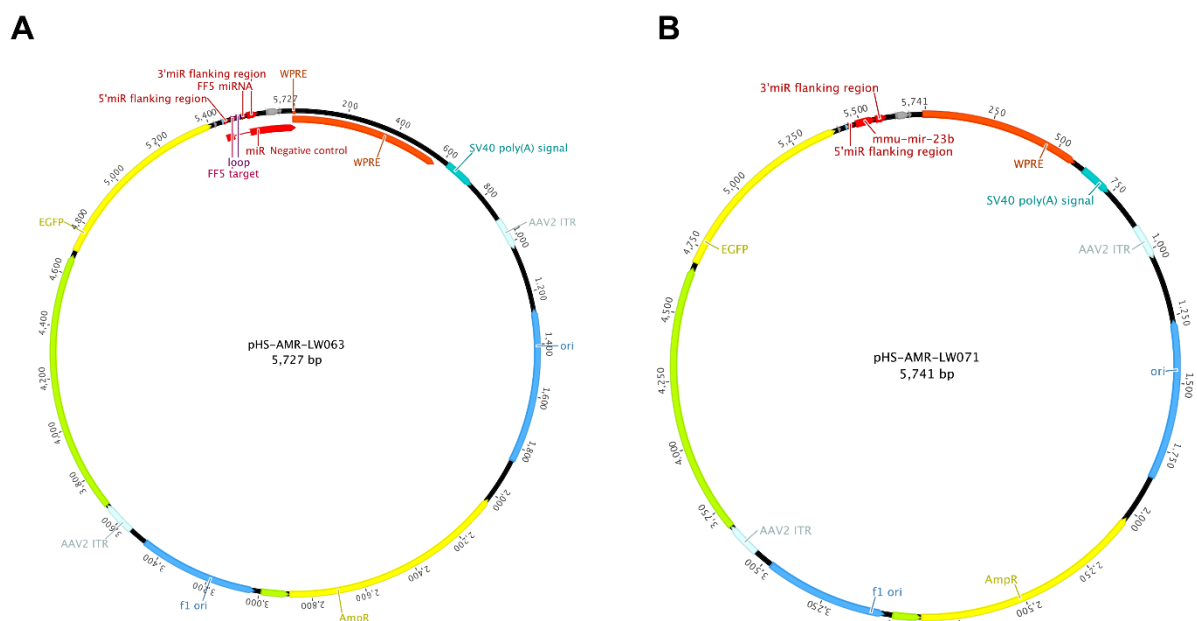

**Supplementary Figure 6. Structural diagram of the AAV-NC (A) and AAV-miR-23b-3p (B).**
